# Supplementary material for: AP-2δ Is the Most Relevant Target of AP-2 Family-Focused Cancer Therapy and Affects Genome Organization
Source: MDPI journal article supplement (doi:10.3390/cells11244124), 2022-12-19
Supplement: s1 [file s1]

**Table S1.** Pairwise comparisons between AP-2 factors with additional all-by-all percentage of identity.

| Comparison            | Percentage of identity | Included in Figure 2A? |
|-----------------------|------------------------|------------------------|
| TFAP2A vs TFAP2B      | 66.026%                |                        |
| TFAP2A vs TFAP2C      | 60.965%                |                        |
| TFAP2A vs TFAP2D      | 45.188%                | ✓                      |
| TFAP2A vs TFAP2E      | 57.456%                |                        |
| TFAP2B vs TFAP2C      | 56.144%                |                        |
| TFAP2B vs TFAP2D      | 43.340%                | ✓                      |
| TFAP2B vs TFAP2E      | 58.071%                |                        |
| TFAP2C vs TFAP2D      | 41.365%                | ✓                      |
| TFAP2C vs TFAP2E      | 51.073%                |                        |
| TFAP2D vs TFAP2E      | 42.505%                | ✓                      |
| All-by-all comparison | 29.377%                | ✓                      |
